# Supplementary material for: Mineral Composition of Cereal and Cereal-Free Dry Dog Foods versus Nutritional Guidelines
Source: PubMed Central journal article supplement (PMC7664208; doi:10.3390/molecules25215173), 2020-11-06
Supplement: molecules-25-05173-s001.pdf [file molecules-25-05173-s001.pdf]

Supplementary Materials

# Mineral Composition of Cereal and Cereal-Free Dry Dog Foods versus Nutritional Guidelines

Katarzyna Kazimierska <sup>1,\*</sup>, Wioletta Biel <sup>1</sup> and Robert Witkowicz <sup>2</sup>

<sup>1</sup> Department of Monogastric Animal Sciences, Division of Animal Nutrition and Food, West Pomeranian University of Technology in Szczecin, 29 Klemensa Janickiego, 71270 Szczecin, Poland; katarzyna.kazimierska@zut.edu.pl; wioletta.biel@zut.edu.pl

<sup>2</sup> Department of Agroecology and Crop Production, University of Agriculture in Krakow, 21 Mickiewicza, 31120 Krakow, Poland; robert.witkowicz@urk.edu.pl

\* Correspondence: katarzyna.kazimierska@zut.edu.pl; Tel.: +48-91-449-6841

**Table 1.** Declarations of mineral additives as presented on the label with results of conversion into actual amounts (mg/kg feed) <sup>1</sup>.

| Product | Microelement | Nutritional additives                        |                                               | Amount declared under heading "Analytical constituents" |
|---------|--------------|----------------------------------------------|-----------------------------------------------|---------------------------------------------------------|
|         |              | -Label declaration under heading "Additives" | Corresponding to actual amount of the element |                                                         |
| 1       | Cu           | 15.00 CuSO <sub>4</sub> · 5H <sub>2</sub> O  | 3.82                                          | NDL                                                     |
|         | Fe           | 50.00 FeSO <sub>4</sub> · H <sub>2</sub> O   | 16.00                                         | NDL                                                     |
|         | Mn           | 35.00 MnSO <sub>4</sub>                      | 12.73                                         | NDL                                                     |
|         | Zn           | 50.00 ZnSO <sub>4</sub> · H <sub>2</sub> O   | 18.21                                         | NDL                                                     |
| 2       | Cu           | 60.00 CuSO <sub>4</sub> · 5H <sub>2</sub> O  | 15.27                                         | NDL                                                     |
|         | Fe           | 160.00 FeSO <sub>4</sub> · H <sub>2</sub> O  | 52.58                                         | NDL                                                     |
|         | Mn           | 110.00 MnO                                   | 85.19                                         | NDL                                                     |
|         | Zn           | 130.00 ZnO                                   | 104.44                                        | NDL                                                     |
| 3       | Cu           | 60.00 CuSO <sub>4</sub> · 5H <sub>2</sub> O  | 15.27                                         | NDL                                                     |
|         | Fe           | 160.00 FeSO <sub>4</sub> · H <sub>2</sub> O  | 52.58                                         | NDL                                                     |
|         | Mn           | 110.00 MnO                                   | 85.19                                         | NDL                                                     |
|         | Zn           | 130.00 ZnO                                   | 104.44                                        | NDL                                                     |
| 4       | Cu           | 60.00 CuSO <sub>4</sub> · 5H <sub>2</sub> O  | 15.27                                         | NDL                                                     |
|         | Fe           | 160.00 FeSO <sub>4</sub> · H <sub>2</sub> O  | 52.58                                         | NDL                                                     |
|         | Mn           | 110.00 MnO                                   | 85.19                                         | NDL                                                     |
|         | Zn           | 130.00 ZnO                                   | 104.44                                        | NDL                                                     |
| 5       | Cu           | 60.00 CuSO <sub>4</sub> · 5H <sub>2</sub> O  | 15.27                                         | NDL                                                     |
|         | Fe           | 160.00 FeSO <sub>4</sub> · H <sub>2</sub> O  | 52.58                                         | NDL                                                     |
|         | Mn           | 110.00 MnO                                   | 85.19                                         | NDL                                                     |
|         | Zn           | 130.00 ZnO                                   | 104.44                                        | NDL                                                     |
| 6       | Cu           | NDL                                          | –                                             | 22.00                                                   |
|         | Fe           | NDL                                          | –                                             | 237.00                                                  |
|         | Mn           | NDL                                          | –                                             | 29.30                                                   |
|         | Zn           | NDL                                          | –                                             | 162.00                                                  |
| 7       | Cu           | 15.00 CuSO <sub>4</sub> · 5H <sub>2</sub> O  | 3.82                                          | NDL                                                     |
|         | Fe           | 70.00 FeSO <sub>4</sub> · H <sub>2</sub> O   | 23.01                                         | NDL                                                     |
|         | Mn           | 35.00 MnO                                    | 27.11                                         | NDL                                                     |
|         | Zn           | 80.00 ZnO                                    | 64.27                                         | NDL                                                     |
| 8       | Cu           | 10.00 Cu                                     | 10.00                                         | NDL                                                     |
|         | Fe           | NDL                                          | –                                             | NDL                                                     |

|    |    |                                             |        |        |
|----|----|---------------------------------------------|--------|--------|
|    | Mn | NDL                                         | –      | NDL    |
|    | Zn | 100.00 Zn                                   | 100.00 | NDL    |
| 9  | Cu | 14.00 CuSO <sub>4</sub> · 5H <sub>2</sub> O | 3.56   | NDL    |
|    | Fe | 48.00 FeSO <sub>4</sub> · H <sub>2</sub> O  | 15.78  | NDL    |
|    | Mn | 33.00 MnSO <sub>4</sub>                     | 12.01  | NDL    |
|    | Zn | 48.00 ZnSO <sub>4</sub> ·H <sub>2</sub> O   | 17.49  | NDL    |
|    |    |                                             |        |        |
| 10 | Cu | NDL                                         | –      | 16.00  |
|    | Fe | NDL                                         | –      | 144.00 |
|    | Mn | NDL                                         | –      | 32.00  |
|    | Zn | NDL                                         | –      | 144.00 |
| 11 | Cu | 7.50 CuSO <sub>4</sub> · 5H <sub>2</sub> O  | 1.91   | NDL    |
|    | Fe | 201.00 FeSO <sub>4</sub> · H <sub>2</sub> O | 66.06  | NDL    |
|    | Mn | 63.00 MnO                                   | 48.79  | NDL    |
|    | Zn | 120.00 ZnO                                  | 96.41  | NDL    |
| 12 | Cu | 8.00 CuSO <sub>4</sub> · 5H <sub>2</sub> O  | 2.04   | NDL    |
|    | Fe | 201.00 FeSO <sub>4</sub> · H <sub>2</sub> O | 66.06  | NDL    |
|    | Mn | 62.00 MnO                                   | 48.02  | NDL    |
|    | Zn | 120.00 ZnO                                  | 96.41  | NDL    |
| 13 | Cu | 8.00 CuSO <sub>4</sub> · 5H <sub>2</sub> O  | 2.04   | NDL    |
|    | Fe | 201.00 FeSO <sub>4</sub> · H <sub>2</sub> O | 66.06  | NDL    |
|    | Mn | 63.00 MnO                                   | 48.79  | NDL    |
|    | Zn | 120.00 ZnSO <sub>4</sub> ·H <sub>2</sub> O  | 43.71  | NDL    |
| 14 | Cu | 8.00 CuSO <sub>4</sub> · 5H <sub>2</sub> O  | 2.04   | NDL    |
|    | Fe | 201.00 FeSO <sub>4</sub> · H <sub>2</sub> O | 66.06  | NDL    |
|    | Mn | 63.00 MnO                                   | 48.79  | NDL    |
|    | Zn | 120.00 ZnSO <sub>4</sub> ·H <sub>2</sub> O  | 43.71  | NDL    |
| 15 | Cu | 7.50 CuSO <sub>4</sub> · 5H <sub>2</sub> O  | 1.91   | NDL    |
|    | Fe | 201.00 FeSO <sub>4</sub> · H <sub>2</sub> O | 66.06  | NDL    |
|    | Mn | 62.50 MnO                                   | 48.40  | NDL    |
|    | Zn | 120.00 ZnO                                  | 96.41  | NDL    |
| 16 | Cu | 10.00 CuSO <sub>4</sub> · 5H <sub>2</sub> O | 2.55   | NDL    |
|    | Fe | 110.00 FeSO <sub>4</sub> · H <sub>2</sub> O | 36.15  | NDL    |
|    | Mn | 25.00 MnO                                   | 19.36  | NDL    |
|    | Zn | 135.00 ZnO                                  | 108.46 | NDL    |
| 17 | Cu | 10.00 CuSO <sub>4</sub> · 5H <sub>2</sub> O | 2.55   | NDL    |
|    | Fe | 110.00 FeSO <sub>4</sub> · H <sub>2</sub> O | 36.15  | NDL    |
|    | Mn | 25.00 MnO                                   | 19.36  | NDL    |
|    | Zn | 125.00 ZnO                                  | 100.43 | NDL    |
| 18 | Cu | 10.00 CuSO <sub>4</sub> · 5H <sub>2</sub> O | 2.55   | NDL    |
|    | Fe | 110.00 FeSO <sub>4</sub> · H <sub>2</sub> O | 36.15  | NDL    |
|    | Mn | 25.00 MnO                                   | 19.36  | NDL    |
|    | Zn | 135.00 ZnO                                  | 108.46 | NDL    |
| 19 | Cu | 11.00 CuSO <sub>4</sub> · 5H <sub>2</sub> O | 2.80   | 15.00  |
|    | Fe | NDL                                         | –      | 290.00 |
|    | Mn | NDL                                         | –      | 25.00  |
|    | Zn | 100.00 ZnO                                  | 80.34  | 210.00 |
| 20 | Cu | 11.00 CuSO <sub>4</sub> · 5H <sub>2</sub> O | 2.80   | 20.00  |
|    | Fe | NDL                                         | –      | 250.00 |
|    | Mn | NDL                                         | –      | 21.00  |
|    | Zn | 160.00 ZnO                                  | 128.55 | 230.00 |
| 21 | Cu | 11.00 Cu                                    | 11.00  | NDL    |

|    |    |                                             |        |        |
|----|----|---------------------------------------------|--------|--------|
|    | Fe | NDL                                         | –      | NDL    |
|    | Mn | NDL                                         | –      | NDL    |
|    | Zn | 100.00 ZnO                                  | 80.34  | NDL    |
| 22 | Cu | 10.00 Cu                                    | 10.00  | NDL    |
|    | Fe | 100.00 Fe                                   | 100.00 | NDL    |
|    | Mn | 10.00 Mn                                    | 10.00  | NDL    |
|    | Zn | 140.00 Zn                                   | 140.00 | NDL    |
| 23 | Cu | 10.00 Cu                                    | 10.00  | NDL    |
|    | Fe | 100.00 Fe                                   | 100.00 | NDL    |
|    | Mn | 10.00 Mn                                    | 10.00  | NDL    |
|    | Zn | 140.00 Zn                                   | 140.00 | NDL    |
| 24 | Cu | 10.00 CuSO <sub>4</sub> · 5H <sub>2</sub> O | 2.55   | NDL    |
|    | Fe | 100.00 FeSO <sub>4</sub> · H <sub>2</sub> O | 32.86  | NDL    |
|    | Mn | 10.00 MnO                                   | 7.74   | NDL    |
|    | Zn | 140.00 ZnSO <sub>4</sub> · H <sub>2</sub> O | 51.00  | NDL    |
| 25 | Cu | 10.00 CuSO <sub>4</sub> · 5H <sub>2</sub> O | 2.55   | NDL    |
|    | Fe | 100.00 FeSO <sub>4</sub> · H <sub>2</sub> O | 32.86  | NDL    |
|    | Mn | 10.00 MnO                                   | 7.74   | NDL    |
|    | Zn | 140.00 ZnSO <sub>4</sub> · H <sub>2</sub> O | 51.00  | NDL    |
| 26 | Cu | 10.00 CuSO <sub>4</sub> · 5H <sub>2</sub> O | 2.55   | NDL    |
|    | Fe | 100.00 FeSO <sub>4</sub> · H <sub>2</sub> O | 32.86  | NDL    |
|    | Mn | 5.00 MnSO <sub>4</sub>                      | 1.82   | NDL    |
|    | Zn | 125.00 ZnSO <sub>4</sub> · H <sub>2</sub> O | 45.53  | NDL    |
| 27 | Cu | 10.00 CuSO <sub>4</sub> · 5H <sub>2</sub> O | 2.55   | NDL    |
|    | Fe | 100.00 FeSO <sub>4</sub> · H <sub>2</sub> O | 32.86  | NDL    |
|    | Mn | 5.00 MnSO <sub>4</sub>                      | 1.82   | NDL    |
|    | Zn | 125.00 ZnSO <sub>4</sub> · H <sub>2</sub> O | 45.53  | NDL    |
| 28 | Cu | 10.00 CuSO <sub>4</sub> · 5H <sub>2</sub> O | 2.55   | NDL    |
|    | Fe | NDL                                         | –      | NDL    |
|    | Mn | NDL                                         | –      | NDL    |
|    | Zn | 115.00 ZnO                                  | 92.39  | NDL    |
| 29 | Cu | 10.00 CuSO <sub>4</sub> · 5H <sub>2</sub> O | 2.55   | 24.00  |
|    | Fe | NDL                                         | –      | 150.00 |
|    | Mn | NDL                                         | –      | 17.00  |
|    | Zn | 100.00 ZnO                                  | 80.34  | 180.00 |
| 30 | Cu | 10.00 CuSO <sub>4</sub> · 5H <sub>2</sub> O | 2.55   | NDL    |
|    | Fe | NDL                                         | –      | NDL    |
|    | Mn | NDL                                         | –      | NDL    |
|    | Zn | 100.00 ZnO                                  | 80.34  | NDL    |

<sup>1</sup>NDL, not declared in the label.

**Table S2.** Declarations of macroelement content under “Analytical constituents” presented on the label (g/kg feed)<sup>1</sup>.

| Product | Amount declared under heading “Analytical constituents” |       |      |      |      |
|---------|---------------------------------------------------------|-------|------|------|------|
|         | Ca                                                      | P     | K    | Na   | Mg   |
| 1       | 12.00                                                   | 9.00  | NDL  | NDL  | NDL  |
| 2       | 11.62                                                   | 11.30 | NDL  | NDL  | NDL  |
| 3       | 22.30                                                   | 10.50 | NDL  | NDL  | NDL  |
| 4       | 10.00                                                   | 5.00  | NDL  | NDL  | NDL  |
| 5       | 24.10                                                   | 15.00 | NDL  | NDL  | NDL  |
| 6       | 15.00                                                   | 10.00 | 4.90 | 3.90 | 1.50 |
| 7       | 12.00                                                   | 10.00 | NDL  | NDL  | NDL  |
| 8       | 14.60                                                   | 13.40 | 3.80 | 3.50 | NDL  |
| 9       | 8.00                                                    | NDL   | NDL  | NDL  | NDL  |
| 10      | 15.00                                                   | 10.00 | 8.50 | 3.50 | 1.60 |
| 11      | 13.00                                                   | 10.00 | NDL  | NDL  | NDL  |
| 12      | 15.00                                                   | 10.00 | NDL  | NDL  | NDL  |
| 13      | 12.50                                                   | 9.00  | NDL  | NDL  | NDL  |
| 14      | 16.00                                                   | 9.00  | NDL  | NDL  | NDL  |
| 15      | 8.00                                                    | 7.00  | NDL  | NDL  | 0.90 |
| 16      | 11.00                                                   | 8.00  | NDL  | 4.50 | NDL  |
| 17      | 14.50                                                   | 9.50  | NDL  | 4.00 | NDL  |
| 18      | 16.00                                                   | 10.50 | NDL  | 3.50 | NDL  |
| 19      | 15.00                                                   | 11.00 | 7.00 | 3.00 | 1.30 |
| 20      | 15.00                                                   | 11.00 | 7.00 | 3.20 | 1.10 |
| 21      | 15.00                                                   | 11.00 | NDL  | NDL  | NDL  |
| 22      | 21.00                                                   | 12.00 | NDL  | NDL  | NDL  |
| 23      | 21.00                                                   | 11.00 | NDL  | NDL  | NDL  |
| 24      | 15.00                                                   | 10.00 | NDL  | NDL  | NDL  |
| 25      | 14.00                                                   | 9.00  | NDL  | NDL  | NDL  |
| 26      | 20.00                                                   | 12.00 | NDL  | NDL  | NDL  |
| 27      | 20.00                                                   | 13.00 | NDL  | NDL  | NDL  |
| 28      | 10.50                                                   | 8.50  | 5.00 | 3.00 | 1.10 |
| 29      | 15.00                                                   | 11.00 | 8.50 | 4.50 | 1.00 |
| 30      | 14.60                                                   | 13.40 | 3.80 | 3.50 | NDL  |

<sup>1</sup>NDL, not declared in the label.
